# Supplementary material
Source: ML conference proceedings conference paper supplement (https://proceedings.mlr.press/v139/chen21r.html)
Supplement: Supplementary file 1 [file chen21r-supp.zip]

Archive with 4 entries (4 files):
- code.zip
- __MACOSX/._code.zip
- supp.pdf
- __MACOSX/._supp.pdf
